# Supplementary material for: Flexibly stretchable acrylic resin elastomer films for efficient electromagnetic shielding and photothermal conversion
Source: Royal Society of Chemistry journal article supplement (doi:10.1039/d3ta07615f), 2024-01-01
Supplement: d3ta07615f1.pdf [file d3ta07615f1.pdf]

**Electronic Supplementary Information**

**Flexibly stretchable acrylic resin elastomer films for efficient electromagnetic  
shielding and photothermal conversion**

*Ruoling Yu<sup>a</sup>, Leilei Liang<sup>b</sup>, Yue Zhao<sup>a</sup>, Guangbin Ji<sup>\*a</sup>*

*<sup>a</sup> College of Materials Science and Technology, Nanjing University of Aeronautics  
and Astronautics, Nanjing 211100, P. R. China*

*<sup>b</sup> School of Electronic Science and Engineering, Nanjing University, Nanjing 210093,  
P. R. China*

*\*Corresponding Author: Prof. Dr. Guangbin Ji, E-mail: [gbi@nuaa.edu.cn](mailto:gbi@nuaa.edu.cn)*

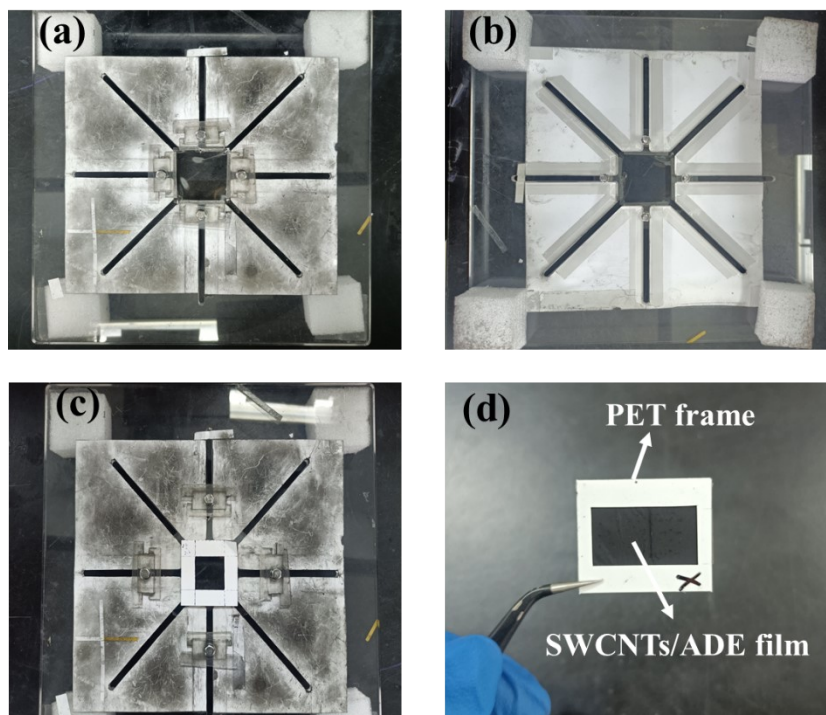

**Supplementary Figure 1.** Digital images of the top view **(a)** and bottom view **(b)** of the two-axis stretchable device. **(c)** Digital image of a two-axis stretchable device when sprayed with a custom sized mask. **(d)** Digital images of SWCNTs/ADE films fixed with a polyethylene terephthalate (PET) rectangular frame.

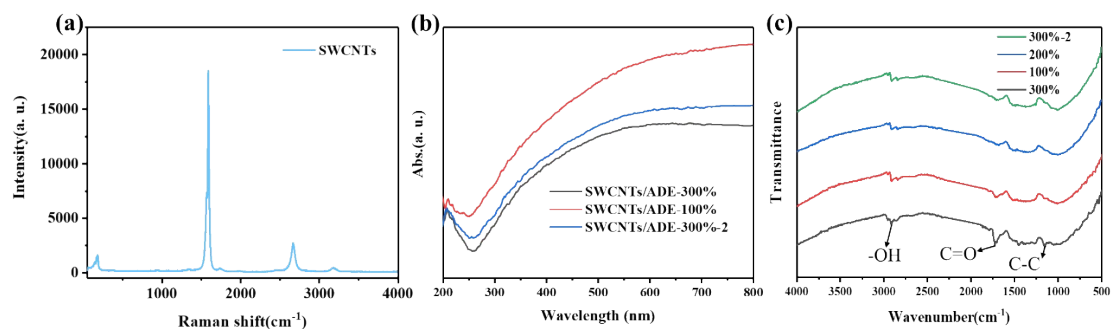

**Supplementary Figure 2.** **(a)** Raman spectra of pure single-walled carbon nanotube used in the experiment. **(b)** UV-Vis spectra of the SWCNTs/ADE films. **(c)** FTIR spectra of the SWCNTs/ADE films.

Due to the high purity of the single-wall carbon nanotube (SWCNTs), the content of amorphous carbon is very small, so the D-peak is not obvious. Because the degree of

graphitization of SWCNTs is high, so the unsaturated functional groups in the carbon nanotubes are few, thus, the vibration of the -OH peak at  $2913\text{ cm}^{-1}$  and the C=O peak at  $1726\text{ cm}^{-1}$  is caused by the unsaturated functional groups in the acrylic resin substrate. The highest absorption of SWCNTs/ADE films at  $8.6\text{ }\mu\text{m}$  was due to the C-C peak absorption at  $1152\text{ cm}^{-1}$ , which resulted in the C-C bond in the conductive layer of SWCNTs.

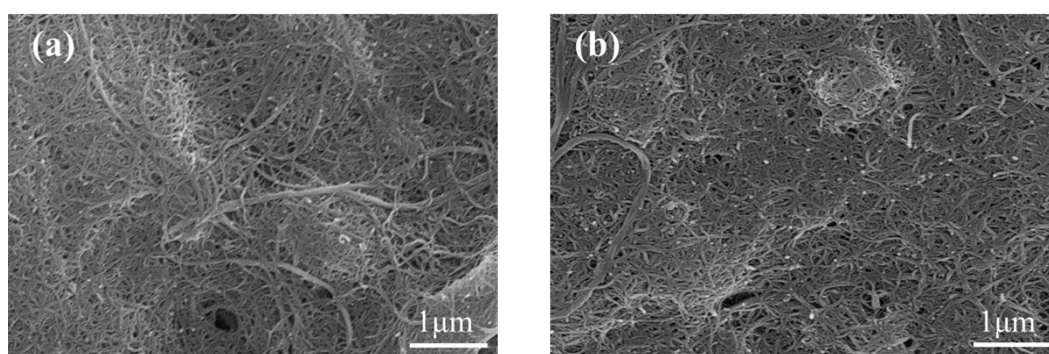

**Supplementary Figure 3.** SEM images of the SWCNTs distributed randomly and evenly on the ADE substrate of (a) 300% areal strain and (b) 100% areal strain.

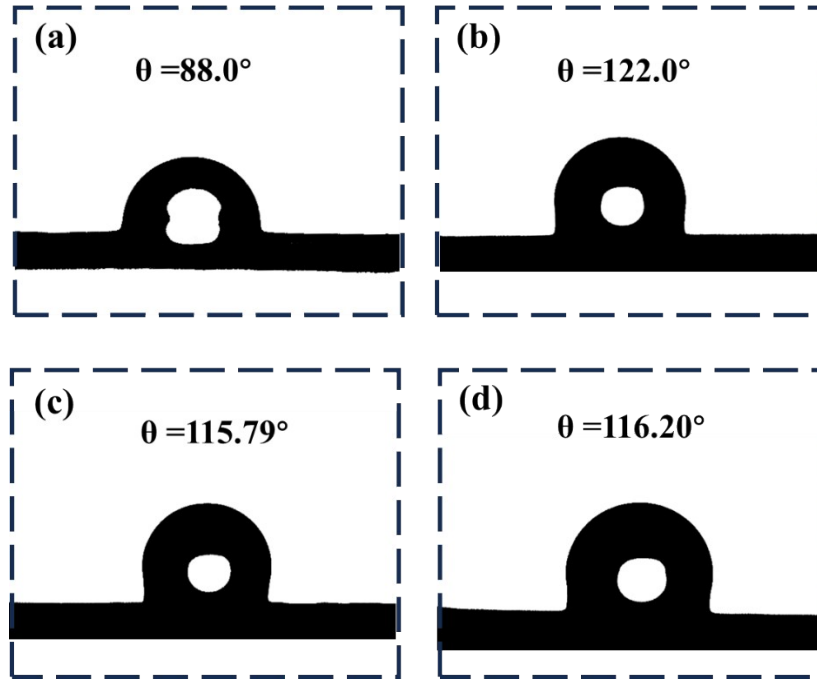

**Supplementary Figure 4.** (a) Digital image of water contact angle of the blank VHB film. Digital images of water contact angles of SWCNTs/ADE films at different applied areal strains: 150% (b); 250% (c); 300%-2 (d).

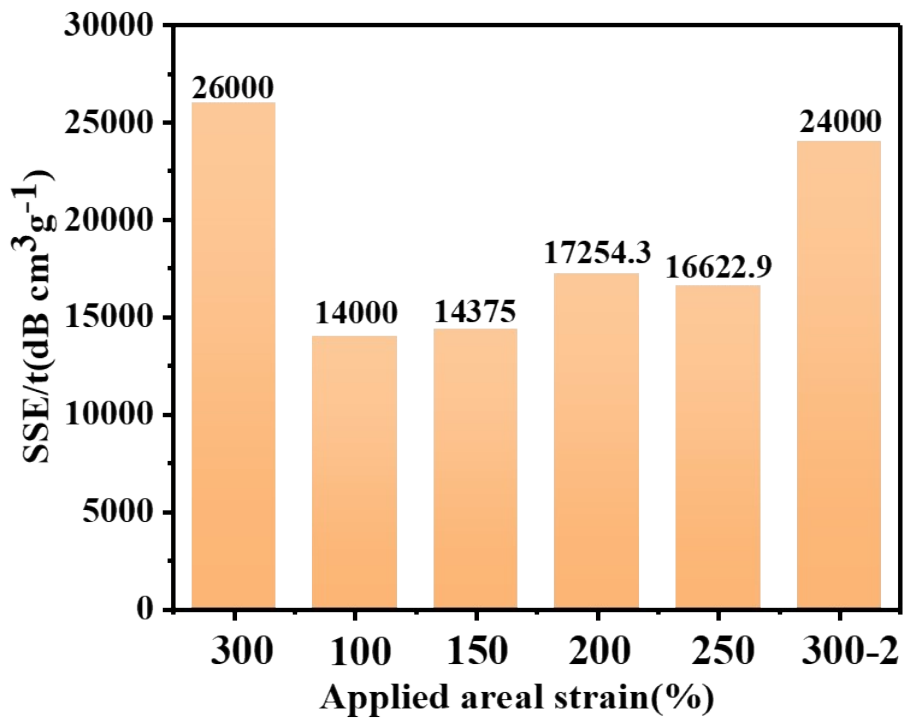

**Supplementary Figure 5.** SSE/t values of SWCNTs/ADE films under different applied areal strains.

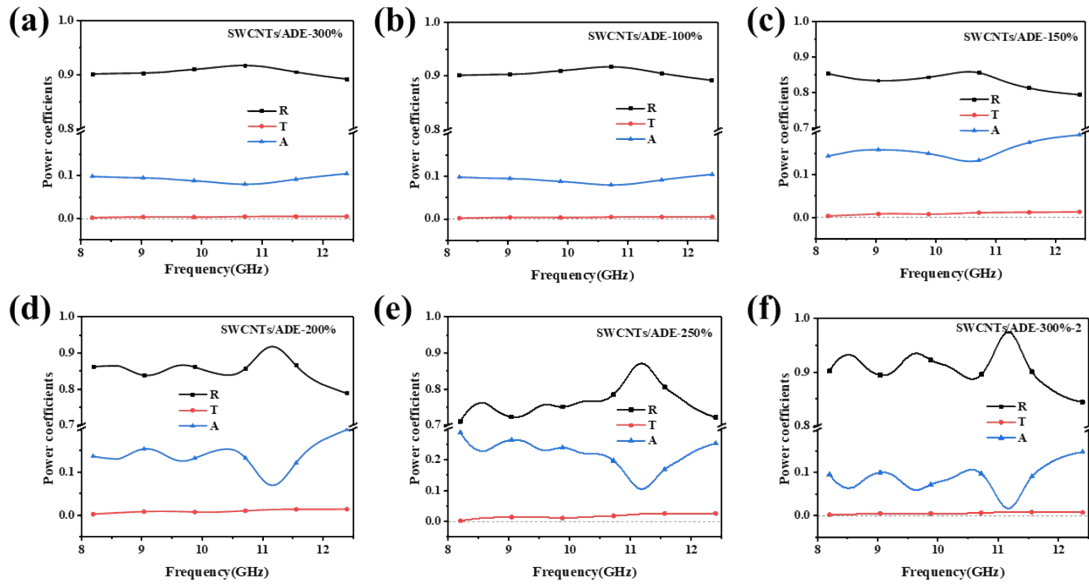

**Supplementary Figure 6.** Power coefficients of SWCNTs/ADE films at different applied areal strains: 300% (a); 100% (b); 150% (c); 200% (d); 250% (e) and 300%-2 (f).

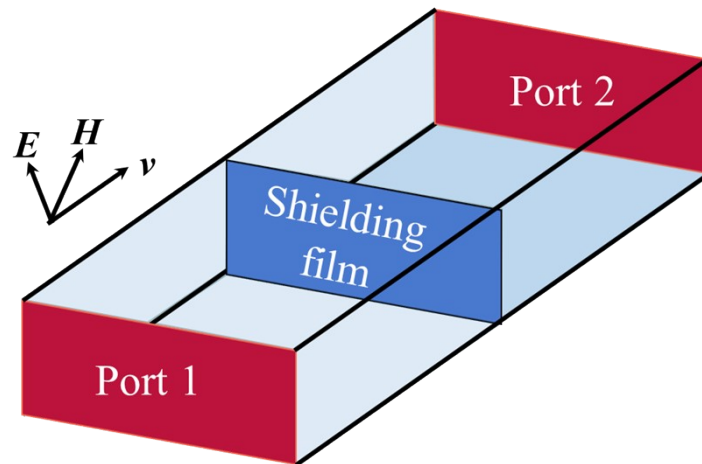

**Supplementary Figure 7.** The waveguide model for EMI shielding performance simulation.

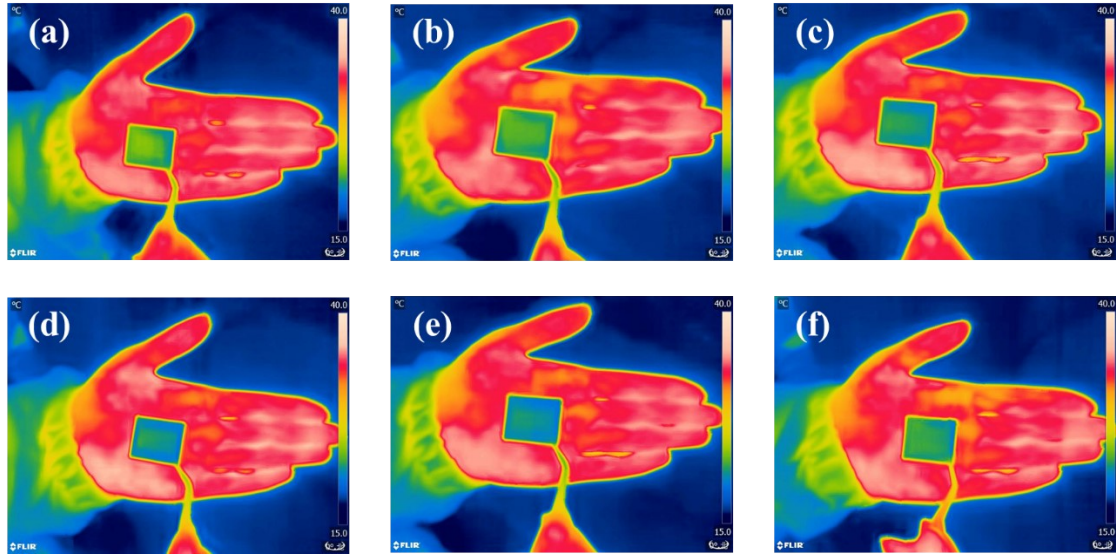

**Supplementary Figure 8.** Infrared thermal images of SWCNTs/ADE films under different applied areal strains without heating: 300%(a); 100%(b); 150%(c); 200%(d); 250%(e); 300%-2(f).

**Supplementary Table 1.** Bending times and electromagnetic interference shielding efficiency.

| Bending Cycles | Shielding efficiency (%) |
|----------------|--------------------------|
| 0              | 99.9%                    |
| 200            | 99.85%                   |
| 400            | 99.6%                    |
| 600            | 98.85%                   |
| 800            | 98.03%                   |
| 1000           | 96%                      |
